# Supplementary material for: Time-lapse Raman imaging of osteoblast differentiation
Source: PubMed Central journal article supplement (PMC4515588; doi:10.1038/srep12529), 2015-07-27
Supplement: srep12529-s1.pdf [file srep12529-s1.pdf]

# Time-lapse Raman imaging of osteoblast differentiation

## Supplementary Information

Aya Hashimoto<sup>a</sup>, Yoshinori Yamaguchi<sup>a,b,\*</sup>, Liang-da Chiu<sup>a</sup>, Chiaki Morimoto<sup>c</sup>,

Katsumasa Fujita<sup>a</sup>, Masahide Takedachi<sup>c</sup>, , Satoshi Kawata<sup>a</sup>,

Shinya Murakami<sup>c</sup>, and Eiichi Tamiya<sup>a,\*</sup>

<sup>a</sup> Department of Applied Physics, Graduate School of Engineering, Osaka University,  
2-1 Yamadaoka, Suita, Osaka, 565-0871, Japan

<sup>b</sup> Department of Physics, Graduate School of Science, East China University of  
Science and Technology, 130 Meilong Rd., Shanghai, 200237, China

<sup>c</sup> Department of Periodontology, Graduate School of Dentistry, Osaka University,  
1-8 Yamadaoka, Suita, Osaka, 565-0871, Japan

\*Corresponding authors:

Yoshinori Yamaguchi, [yoshi.yamaguchi@ap.eng.osaka-u.ac.jp](mailto:yoshi.yamaguchi@ap.eng.osaka-u.ac.jp)

Eiichi Tamiya, [tamiya@ap.eng.osaka-u.ac.jp](mailto:tamiya@ap.eng.osaka-u.ac.jp)

## Figure Legends

**Figure S1.** Noise reduction of Raman spectra by SVD calculation. (A) Raw and processed data of Raman spectra obtained from KUSA-A1. (B) Plots of the first ten basis vectors resulting from SVD calculation. The blue-letter values indicate contribution factor of the basis vectors.
